# Supplementary material for: Colistin Resistance in Monophasic Isolates of Salmonella enterica ST34 Collected From Meat-Derived Products in Spain, With or Without CMY-2 Co-production
Source: PubMed Central journal article supplement (PMC8770973; doi:10.3389/fmicb.2021.735364), 2022-01-06
Supplement: Data_Sheet_1.pdf [file Data_Sheet_1.pdf]

## Supplementary Material

**Table S1.** Food-borne isolates of *Salmonella enterica* recovered in Asturias along the 2014 to 2019 period.

| LSP <sup>a</sup><br>isolate | Source <sup>b</sup> | Serotype                 | Phage<br>type <sup>c</sup> | R profile <sup>d</sup>  |
|-----------------------------|---------------------|--------------------------|----------------------------|-------------------------|
| 27/14                       | Poultry product     | Infantis 6,7:r:1,5       | ND                         | NAL,SUL,TET             |
| 28/14                       | Carcass surface     | Typhimurium 4,12:i:1,2   | U302                       | AMP,CHL,NAL,SMX,TET     |
| 33/14                       | Red dry sausage     | Typhimurium 4,5,12:i:1,2 | PT120                      | AMP,CHL,NAL,SMX,TET     |
| 34/14                       | Red dry sausage     | Typhimurium 4,5,12:i:1,2 | PT120                      | AMP,CHL,GEN,SMX,TET     |
| 35/14                       | Red dry sausage     | Typhimurium 4,5,12:i:1,2 | PT120                      | AMP,CHL,GEN,SMX,TET     |
| 36/14                       | Red dry sausage     | Typhimurium 4,5,12:i:1,2 | PT120                      | AMP,SMX,TET             |
| 38/14                       | Red dry sausage     | Typhimurium 4,5,12:i:1,2 | RDNC                       | AMP,SMX,TET             |
| 39/14                       | Carcass surface     | Typhimurium 4,12:i:1,2   | U302                       | AMP,CHL,NAL,SMX,TET     |
| 40/14                       | Carcass surface     | Typhimurium 4,12:i:1,2   | PT120                      | AMP,CHL,GEN,SMX,TET     |
| 41/14                       | Red dry sausage     | Typhimurium 4,5,12:i:1,2 | PT120                      | AMP,CHL,GEN,NAL,SMX,TET |
| 42/14                       | Red dry sausage     | Typhimurium 4,5,12:i:1,2 | PT120                      | AMP,CHL,GEN,SMX,TET     |
| 61/14                       | Red dry sausage     | Typhimurium 4,12:i:-     | PT138                      | AMP,STR,SMX,TET         |
| 62/14                       | Red dry sausage     | Typhimurium 4,12:i:-     | PT138                      | AMP,STR,SMX,TET         |
| 63/14                       | Red dry sausage     | Typhimurium 4,5,12:i:1,2 | PT120                      | AMP,STR,SMX,TET         |
| 64/14                       | Red dry sausage     | Bovismorbificans         | ND                         | AMP,CHL,NAL,TET         |
| 65/14                       | Red dry sausage     | Derby 4,12:f,g:-         | ND                         | STR,SMX,TET             |
| 112/14                      | Red dry sausage     | Typhimurium 4,12:i:1,2   | PT195                      | AMP,CHL,NAL,TET         |
| 113/14                      | Carcass surface     | Rissen 6,7:fg:-          | ND                         | AMP,TET                 |
| 114/14                      | Carcass surface     | Typhimurium 4,5,12:i:-   | PT193                      | AMP,STR,SMX,TET         |
| 115/14                      | Carcass surface     | Rissen 6,7:fg:-          | ND                         | AMP,CHL,TET             |
| 116/14                      | Carcass surface     | Typhimurium 4,12:i:1,2   | UT                         | AMP,TET                 |
| 121/14                      | Carcass surface     | Rissen 6,7:fg:-          | ND                         | AMP,SMX,TET             |
| 122/14                      | Carcass surface     | Rissen 6,7:fg:-          | ND                         | AMP,TET                 |
| 131/14                      | Carcass surface     | Rissen 6,7:fg:-          | ND                         | AMP,CHL,SMX,TET         |

## Supplementary Material

|        |                  |                          |       |                         |
|--------|------------------|--------------------------|-------|-------------------------|
| 132/14 | Carcass surface  | Typhimurium 4,5,12:i:1,2 | PT120 | AMP,CHL,SMX,TET         |
| 133/14 | Carcass surface  | London 3,10:l,v:1,6      | ND    | AMP,TET                 |
| 134/14 | Carcass surface  | Rissen 6,7:fg:-          | ND    | AMP,SMX,TET             |
| 135/14 | Carcass surface  | Rissen 6,7:fg:-          | ND    | AMP,CHL,TET             |
| 136/14 | Carcass surface  | London 3,10:l,v:1,6      | ND    | AMP,CHL,NAL,SMX,TET,TMP |
| 137/14 | Carcass surface  | London 3,10:l,v:1,6      | ND    | AMP,CHL,SMX,TET,TMP     |
| 138/14 | Carcass surface  | Typhimurium 4,12:i:-     | PT193 | AMP,STR,SMX,TET         |
| 151/14 | Carcass surface  | Anatum 3,10:d:1,2        | ND    | AMP,CHL,NAL,SMX,TET     |
| 152/14 | Red dry sausage  | Anatum 3,10:d:1,2        | ND    | AMP,CHL,NAL,SMX,TET,TMP |
| 153/14 | Red dry sausage  | Anatum 3,10:d:1,2        | ND    | AMP,CHL,NAL,SMX,TET,TMP |
| 154/14 | Red dry sausage  | Typhimurium 4,5,12:i:-   | PT138 | TET                     |
| 159/14 | Carcass surface  | Typhimurium 4,12:i:1,2   | UT    | AMP,CHL,NAL,SMX,TET     |
| 160/14 | Carcass surface  | Typhimurium 4,12:i:1,2   | PT195 | AMP,CHL,NAL,SMX,TET,TMP |
| 161/14 | Carcass surface  | Typhimurium 4,12:i:1,2   | PT195 | AMP,SMX,TET,TMP         |
| 162/14 | Carcass surface  | Typhimurium 4,12:i:1,2   | UT    | NAL,TET                 |
| 163/14 | Carcass surface  | Typhimurium 4,12:i:1,2   | PT195 | AMP,NAL,SMX,TET,TMP     |
| 164/14 | Carcass surface  | Typhimurium 4,12:i:1,2   | PT195 | AMP,SMX,TET             |
| 165/14 | Carcass surface  | Typhimurium 4,12:i:1,2   | PT138 | AMP,STR,SMX,TET         |
| 166/14 | Carcass surface  | Anatum 3,10:d:1,2        | ND    | AMP,CHL,NAL,SMX,TET     |
| 167/14 | Dry meat product | Anatum 3,10:d:1,2        | ND    | AMP,CHL,TET             |
| 168/14 | Dry meat product | Anatum 3,10:d:1,2        | ND    | AMP,CHL,NAL,SMX,TET     |
| 169/14 | Dry meat product | Anatum 3,10:d:1,2        | ND    | CHL,TET                 |
| 170/14 | Dry meat product | Anatum 3,10:d:1,2        | ND    | CHL,NAL,TET             |
| 171/14 | Dry meat product | Anatum 3,10:d:1,2        | ND    | AMP,CHL,NAL,TET         |
| 172/14 | Dry meat product | Anatum 3,10:d:1,2        | ND    | AMP,CHL,NAL,SMX,TET     |
| 173/14 | Dry meat product | Anatum 3,10:d:1,2        | ND    | TET                     |
| 174/14 | Dry meat product | Anatum 3,10:d:1,2        | ND    | AMP,CHL,NAL,SMX,TET     |
| 175/14 | Dry meat product | Anatum 3,10:d:1,2        | ND    | TET                     |
| 185/14 | Dry meat product | Anatum 3,10:d:1,2        | ND    | AMP,TET                 |
| 186/14 | Stewed meat      | Anatum 3,10:d:1,2        | ND    | TET                     |
| 187/14 | Stewed meat      | Anatum3,10:d:1,2         | ND    | TET                     |

|        |                    |                                   |        |                             |
|--------|--------------------|-----------------------------------|--------|-----------------------------|
| 188/14 | Stewed meat        | Anatum3, 10:d:1,2                 | ND     | CHL,NAL,SMX,TET             |
| 221/14 | Tuna fish roll     | Coeln 4,5,12:y:1,2                | ND     | S                           |
| 273/14 | Clams              | Napoli 9, 12:l,z13:e,n,x          | ND     | S                           |
| 274/14 | Clams              | Ndolo 1,9,12:d:1,5                | ND     | CHL                         |
| 291/14 | Razor clams        | Typhimurium 4,5,12:i:-            | RDNC   | AMP,CHL,STR,SMX,TET         |
| 292/14 | Fresh meat product | Typhimurium 4, 12:i:-             | PT193  | TET                         |
| 293/14 | Fresh meat product | Typhimurium 4, 12:i:-             | PT104B | AMP,STR,SUL,TET             |
| 294/14 | Fresh meat product | Typhimurium 4,5,12:i:1,2          | U310   | AMP,TET                     |
| 295/14 | Fresh meat product | Typhimurium 4,5,12:i:-            | UT     | STR,TET                     |
| 296/14 | Fresh meat product | Typhimurium 4, 12:i:1,2           | U302   | AMP,CHL,NAL,SMX,TET         |
| 297/14 | Dry creole sausage | Typhimurium 4, 12:i:1,2           | U302   | AMP,CHL,NAL,SMX,TET         |
| 298/14 | Dry creole sausage | Typhimurium 4, 12:i:1,2           | U302   | AMP,STR,SMX,TET             |
| 299/14 | Dry creole sausage | Typhimurium 4, 12:i:1,2           | U302   | AMP,CHL,NAL,SMX,TET         |
| 300/14 | Dry creole sausage | Typhimurium 4, 12:i:1,2           | U302   | AMP,CHL,NAL,SMX,TET         |
| 301/14 | Dry creole sausage | Enteritidis 1,9,12.g,m:-          | ND     | AMP,CHL,NAL,SMX,TET,AZM     |
| 302/14 | Meat product       | Amberg 6, 14,24:l,v:1,7           | ND     | AMP,CHL,NAL,SMX,TET         |
| 305/14 | Fresh meat product | Typhimurium 4, 12:i:1,2           | PT195  | AMP,CHL,NAL,SMX,TET         |
| 306/14 | Meat product       | Brandenburg<br>1,4,12:l,v:e,n,z15 | ND     | AMP,CHL,NAL,SMX,TET         |
| 388/14 | Meat product       | Typhimurium 4, 12:i:-             | RDNC   | AMP,STR,SMX,TET             |
| 389/14 | Fresh meat product | Typhimurium 4, 12:i:-             | PT104B | AMP,STR,SMX,TET             |
| 390/14 | Fresh meat product | Typhimurium 4, 12:i:-             | PT104B | AMP,STR,SMX,TET             |
| 391/14 | Fresh meat product | Typhimurium 4, 12:i:-             | PT104B | AMP,STR,SMX,TET             |
| 393/14 | Fresh meat product | Derby 4, 12:f,g:-                 | ND     | STR,SMX,TET                 |
| 394/14 | Meat product       | Typhimurium 4,5,12:i:-            | RDNC   | AMP,STR,SMX,TET             |
| 395/14 | Meat product       | Derby 4, 12:f,g:-                 | ND     | STR,SMX,TET                 |
| 396/14 | Meat product       | Derby 4, 12:f,g:-                 | ND     | STR,SMX,TET                 |
| 399/14 | Meat product       | Typhimurium 4, 12:i:1,2           | PT195  | AMP,NAL,TET                 |
| 400/14 | Meat product       | Rissen 6,7:fg:-                   | ND     | AMP,CHL,SMX,TET,TMP,AZM     |
| 401/14 | Meat product       | Rissen 6,7:fg:-                   | ND     | AMP,CHL,NAL,SMX,TET,TMP,AZM |
| 402/14 | Meat product       | Rissen 6,7:fg:-                   | ND     | AMP,CHL,GEN,SMX,TET,TMP,AZM |
| 403/14 | Meat product       | Rissen 6,7:fg:-                   | ND     | AMP,CHL,NAL,SMX,TET,TMP,AZM |

## Supplementary Material

|        |                         |                          |       |                             |
|--------|-------------------------|--------------------------|-------|-----------------------------|
| 404/14 | Meat product            | Rissen 6,7:fg:-          | ND    | AMP,CHL,NAL,SMX,TET,TMP,AZM |
| 405/14 | Meat product            | Typhimurium 4,5,12:i:-   | U311  | TET                         |
| 406/14 | Raw marinated meat      | Typhimurium 4,5,12:i:-   | UT    | TET                         |
| 407/14 | Raw marinated meat      | Typhimurium 4,5,12:i:-   | U311  | TET                         |
| 408/14 | Raw marinated meat      | Typhimurium 4,5,12:i:-   | U311  | TET                         |
| 419/14 | Raw marinated meat      | Typhimurium 4,5,12:i:-   | U311  | SMX,TET                     |
| 449/14 | Raw marinated meat      | Typhimurium 4,5,12:i:1,2 | RDNC  | AMP                         |
| 456/14 | Shellfish               | Typhimurium 4,5,12:i:1,2 | RDNC  | TET                         |
| 457/14 | Shellfish               | Rissen 6,7:fg:-          | ND    | NAL,TET,TMP                 |
| 498/14 | Meat product            | Typhimurium 4,12:i:-     | PT138 | AMP,STR,SMX,TET             |
| 29/15  | Porcine carcass surface | London 3,10:l,v:1,6      | ND    | AMP,CHL,SMX,TET,TMP         |
| 30/15  | Porcine carcass surface | London 3,10:l,v:1,6      | ND    | AMP,CHL,SMX,TET,TMP         |
| 31/15  | Porcine carcass surface | Derby 4,12:f:g:-         | ND    | STR                         |
| 32/15  | Porcine carcass surface | Derby 4,12:f:g:-         | ND    | STR                         |
| 33/15  | Porcine carcass surface | Derby 4,12:f:g:-         | ND    | S                           |
| 34/15  | Porcine carcass surface | London 3,10:l,v:1,6      | ND    | AMP,CHL,SMX,TET,TMP         |
| 35/15  | Porcine carcass surface | Typhimurium 4,12:i:1,2   | U302  | AMP,CHL,CIP,NAL,SMX,TET     |
| 36/15  | Porcine carcass surface | Typhimurium 4,12:i:-     | PT195 | AMP,TET                     |
| 37/15  | Porcine carcass surface | Typhimurium 4,12:i:-     | PT195 | AMP,TET                     |
| 38/15  | Porcine carcass surface | Typhimurium 4,12:i:-     | PT195 | AMP,TET                     |
| 39/15  | Poultry product         | Typhimurium 4,12:i:1,2   | U302  | AMP,CHL,SMX,TET             |
| 40/15  | Porcine carcass surface | Typhimurium 4,12:i:1,2   | U302  | AMP,CHL,CIP,NAL,SMX,TET     |
| 55/15  | Dry meat product        | Typhimurium 4,12:i:-     | PT195 | AMP,TET                     |
| 56/15  | Dry meat product        | Typhimurium 4,12:i:-     | PT195 | AMP,TET                     |
| 57/15  | Dry meat product        | Typhimurium 4,12:i:-     | PT195 | AMP,TET                     |
| 58/15  | Red dry sausage         | Enteritidis 9,12:g,m:-   | 21    | NAL                         |
| 59/15  | Red dry sausage         | Enteritidis 9,12:g,m:-   | 21    | NAL                         |
| 60/15  | Red dry sausage         | Enteritidis 9,12:g,m:-   | 21    | NAL                         |
| 61/15  | Dry meat product        | Typhimurium 4,5,12:i:-   | RDNC  | AMP,STR,SMX,TET             |
| 62/15  | Dry meat product        | Typhimurium 4,5,12:i:-   | RDNC  | AMP,STR,SMX,TET             |
| 63/15  | Dry meat product        | Typhimurium 4,5,12:i:-   | RDNC  | AMP,STR,SMX,TET             |

|               |                                                         |                                |        |                            |
|---------------|---------------------------------------------------------|--------------------------------|--------|----------------------------|
| 119/15        | Porcine carcass surface                                 | Derby 4, 12:f:g:-              | ND     | STR,SMX,TET                |
| 120/15        | Porcine carcass surface                                 | Typhimurium 4, 12:i:1,2        | PT104  | AMP,CHL,SMX,TET            |
| 121/15        | Porcine carcass surface                                 | Typhimurium 4, 12:i:1,2        | PT104A | AMP,CHL,SMX,TET            |
| 124/15        | Porcine carcass surface                                 | Rissen 6,7:f:g:-               | ND     | TET                        |
| 125/15        | Porcine carcass surface                                 | Reading 4,5, 12:e,h:1,5        | ND     | S                          |
| 126/15        | Bovine carcass surface                                  | Typhimurium 4, 12:i            | RDNC   | AMP,STR,SMX,TET            |
| 127/15        | Bovine carcass surface                                  | Typhimurium 4, 12:i            | RDNC   | AMP,STR,SMX,TET            |
| 128/15        | Bovine carcass surface                                  | Typhimurium 4,5, 12:i:1,2      | RDNC   | AMP,SMX,TET                |
| 129/15        | Bovine carcass surface                                  | Typhimurium 4,5, 12:i:1,3      | RDNC   | AMP,SMX,TET                |
| 130/15        | Porcine carcass surface                                 | Rissen 6,7:f:g:-               | ND     | TET                        |
| 131/15        | Porcine carcass surface                                 | Rissen 6,7:f:g:-               | ND     | TET                        |
| 132/15        | Porcine carcass surface                                 | Rissen 6,7:f:g:-               | ND     | TET                        |
| 133/15        | Porcine carcass surface                                 | Typhimurium 4,5, 12:i:1,2      | RDNC   | AMP,CHL,SMX,TET            |
| 134/15        | Porcine carcass surface                                 | Typhimurium 4, 12:i:1,2        | PT120  | AMP,CHL,SMX,TET            |
| <b>136/15</b> | <b>Porcine carcass surface</b>                          | <b>Kedougou 13,23:i:l,w</b>    | ND     | <b>SMX,TET, COL</b>        |
| 137/15        | Porcine carcass surface                                 | Rissen 6,7:f:g:-               | ND     | TET                        |
| 138/15        | Porcine carcass surface                                 | Rissen 6,7:f:g:-               | ND     | TET                        |
| 151/15        | Porcine carcass surface                                 | Bovismorbificans 6,8:r:1,5     | ND     | S                          |
| 153/15        | Porcine carcass surface                                 | Typhimurium 4, 12:i:-          | PT138  | AMP,STR,SMX,TET            |
| 154/15        | Porcine carcass surface                                 | Rissen 6,7:f:g:-               | ND     | TET                        |
| 183/15        | Fresh eggs                                              | Typhimurium 4, 12:i:-          | RDNC   | AMP,STR,SMX,TET            |
| 232/15        | Minced meat                                             | Typhimurium 4, 12:i:-          | PT195  | AMP,STR,SMX,TET            |
| 233/15        | Minced meat                                             | Typhimurium 4, 12:i:-          | PT195  | AMP,STR,SMX,TET            |
| 234/15        | Minced meat                                             | Typhimurium 4, 12:i:-          | PT195  | AMP,STR,SMX,TET            |
| 235/15        | Bovine carcass surface                                  | Typhimurium 4, 12:i:-          | ND     | AMP,STR,TET                |
| 236/15        | Bovine carcass surface                                  | Typhimurium 4, 12:i:-          | ND     | AMP,STR,SMX,TET,TMP        |
| <b>237/15</b> | <b>Pork and beef meat processed for raw consumption</b> | <b>Typhimurium 4, 12:i:-</b>   | PT104B | <b>AMP,STR,SMX,TET,COL</b> |
| 238/15        | Pork and beef meat processed for raw consumption        | Typhimurium 4, 12:i:-          | PT104B | AMP,STR,SMX,TET            |
| <b>295/15</b> | <b>Pork and beef minced meat</b>                        | <b>Typhimurium 4,5, 12:i:-</b> | PT138  | <b>AMP,STR,SMX,TET,COL</b> |
| 296/15        | Pork and beef minced meat                               | Typhimurium 4,5, 12:i:-        | PT138  | AMP,STR,SMX,TET            |
| 297/15        | Pork and beef minced meat                               | Typhimurium 4,5, 12:i:-        | PT138  | AMP,STR,SMX,TET            |

|               |                                  |                               |             |                            |
|---------------|----------------------------------|-------------------------------|-------------|----------------------------|
| <b>298/15</b> | <b>Pork and beef minced meat</b> | <b>Typhimurium 4,5,12:i:-</b> | <b>RDNC</b> | <b>AMP,STR,SMX,TET,COL</b> |
| 299/15        | Pork and beef minced meat        | Typhimurium 4,5,12:i:-        | PT138       | AMP,STR,SMX,TET            |
| 313/15        | Pork and beef minced meat        | Typhimurium 4,5,12:i:-        | PT138       | AMP,STR,SMX,TET            |
| 314/15        | Pork and beef minced meat        | Typhimurium 4,5,12:i:-        | PT138       | AMP,STR,SMX,TET            |
| 315/15        | Pork and beef minced meat        | Typhimurium 4,5,12:i:-        | PT138       | AMP,STR,SMX,TET            |
| 316/15        | Pork and beef minced meat        | Typhimurium 4,5,12:i:-        | PT138       | AMP,STR,SMX,TET            |
| 317/15        | Pork and beef minced meat        | Typhimurium 4,5,12:i:-        | PT138       | AMP,STR,SMX,TET            |
| 318/15        | Fresh meat product               | Derby 4,12:f,g:-              | ND          | NAL,STR,SUL,TET            |
| 319/15        | Minced meat                      | Typhimurium 4,5,12:i:-        | U302        | AMP,AMX,CHL,GEN,STR,TET    |
| 320/15        | Minced meat                      | Typhimurium 4,5,12:i:-        | PT22        | AMP,AMX,CHL,GEN,STR,TET    |
| 321/15        | Minced meat                      | Typhimurium 4,5,12:i:-        | PT22        | AMP,AMX,CHL,GEN,STR,TET    |
| 322/15        | Minced meat                      | Typhimurium 4,5,12:i:-        | PT22        | AMP,AMX,CHL,GEN,STR,TET    |
| 323/15        | Minced meat                      | Typhimurium 4,5,12:i:-        | PT22        | AMP,AMX,CHL,GEN,STR,TET    |
| 348/15        | Wild boar minced meat            | Typhimurium 4,5,12:i:-        | RDNC        | AMP,STR,SMX,TET            |
| 349/15        | Wild boar minced meat            | Typhimurium 4,5,12:i:-        | RDNC        | AMP,STR,SMX,TET            |
| 350/15        | Wild boar minced meat            | Typhimurium 4,5,12:i:-        | PT138       | AMP,STR,SMX,TET            |
| 351/15        | Wild boar minced meat            | Typhimurium 4,5,12:i:-        | PT138       | AMP,CIP(I)-STR,SMX,TET     |
| 352/15        | Wild boar minced meat            | Typhimurium 4,5,12:i:-        | RDNC        | AMP,STR,SMX,TET            |
| 353/15        | Wild boar minced meat            | Typhimurium 4,5,12:i:-        | RDNC        | AMP,STR,SMX,TET            |
| 354/15        | Wild boar minced meat            | Typhimurium 4,5,12:i:-        | RDNC        | AMP,STR,SMX,TET            |
| 355/15        | Wild boar minced meat            | Typhimurium 4,5,12:i:-        | RDNC        | AMP,CHL,STR,SMX,TET        |
| 356/15        | Wild boar minced meat            | Typhimurium 4,5,12:i:-        | RDNC        | AMP,GEN,STR,SMX,TET        |
| 357/15        | Wild boar minced meat            | Typhimurium 4,5,12:i:-        | PT138       | AMP,CIP(I),STR,SMX,TET     |
| 358/15        | Wild boar minced meat            | Typhimurium 4,5,12:i:-        | PT138       | AMP,CIP(I),STR,SMX,TET     |
| 359/15        | Wild boar minced meat            | Typhimurium 4,12:i:-          | PT138       | AMP,CIP(I),STR,SMX,TET     |
| 360/15        | Wild boar minced meat            | Typhimurium 4,12:i:-          | PT138       | AMP,STR,SMX,TET            |
| 361/15        | Wild boar minced meat            | Typhimurium 4,5,12:i:-        | RDNC        | AMP,STR,SMX,TET            |
| 362/15        | Wild boar minced meat            | Typhimurium 4,5,12:i:-        | RDNC        | AMP,STR,SMX,TET            |
| 9/16          | Red dry sausage                  | Rissen 6,7:fg:-               | ND          | AMP,GEN,TET                |
| 17/16         | Porcine carcass surface          | Typhimurium 4,12:i:1,2        | RDNC        | S                          |
| 81/16         | Bovine carcass surface           | Derby 4,12:f,g:-              | ND          | S                          |

|        |                         |                        |        |                         |
|--------|-------------------------|------------------------|--------|-------------------------|
| 82/16  | Minced meat             | Derby 4,12:f,g:-       | ND     | STR                     |
| 83/16  | Minced meat             | Derby 4,12:f,g:-       | ND     | S                       |
| 84/16  | Fresh sausage           | Typhimurium 4,12:i:-   | NT     | AMP                     |
| 85/16  | Fresh sausage           | Typhimurium 4,12:i:-   | ND     | AMP                     |
| 86/16  | Fresh sausage           | Typhimurium 4,12:i:-   | PT138  | AMP                     |
| 87/16  | Fresh sausage           | Typhimurium 4,12:i:-   | PT104b | AMP                     |
| 88/16  | Minced meat             | Typhimurium 4,12:i:-   | ND     | AMP,STR,SMX             |
| 89/16  | Minced meat             | Goldcoast 6,8:r,l,w    | RDNC   | AMP,SMX,TET,TMP         |
| 90/16  | Chorizo hash            | Typhimurium 4,5,12:i:- | NT     | AMP,STR,SMX,TET         |
| 91/16  | Minced meat             | Derby 4,12:f,g:-       | ND     | S                       |
| 92/16  | Porcine carcass surface | Typhimurium 4,12:i:-   | 195    | STR                     |
| 93/16  | Porcine carcass surface | Typhimurium 4,5,12:i:- | NT     | AMP,GEN,STR,SMX,TET,TOB |
| 94/16  | Porcine carcass surface | Rissen 6,7:fg:-        | NT     | CHL                     |
| 101/16 | Minced meat             | Derby 4,12:f,g:-       | ND     | NAL                     |
| 102/16 | Minced meat             | Derby 4,12:f,g:-       | ND     | S                       |
| 103/16 | Minced meat             | Derby 4,12:f,g:-       | ND     | S                       |
| 197/16 | Bovine carcass surface  | Typhimurium 4,12:i:-   | PT195  | AMP,STR,SMX,TET         |
| 267/16 | Fresh egg               | Enteritidis 9,12:g,m:- | NT     | S                       |
| 268/16 | Fresh egg               | Enteritidis 9,12:g,m:- | NT     | S                       |
| 269/16 | Fresh egg               | Enteritidis 9,12:g,m:- | PT34   | S                       |
| 270/16 | Fresh egg               | Enteritidis 9,12:g,m:- | NT     | S                       |
| 271/16 | Eggshell                | Enteritidis 9,12:g,m:- | NT     | S                       |
| 301/16 | Eggshell                | Enteritidis 9,12:g,m:- | PT59   | S                       |
| 320/16 | Eggshell                | Enteritidis 9,12:g,m:- | NT     | S                       |
| 321/16 | Eggshell                | Enteritidis 9,12:g,m:- | NT     | S                       |
| 323/16 | Eggshell                | Enteritidis 9,12:g,m:- | NT     | S                       |
| 324/16 | Eggshell                | Enteritidis 9,12:g,m:- | 56     | S                       |
| 325/16 | Eggshell                | Enteritidis 9,12:g,m:- | NT     | S                       |
| 326/16 | Fresh egg               | Enteritidis 9,12:g,m:- | 56     | S                       |
| 327/16 | Fresh egg               | Enteritidis 9,12:g,m:- | 56     | S                       |
| 328/16 | Spanish omelette        | Enteritidis 9,12:g,m:- | 56     | S                       |
| 66/17  | Carcass surface         | Enteritidis 9,12:g,m:- | 56     | ND                      |

|              |                            |                               |           |                                                             |
|--------------|----------------------------|-------------------------------|-----------|-------------------------------------------------------------|
| 67/17        | Marinated pork minced meat | Typhimurium 4,5,12:i:-        | ND        | AMP,STR,SMX,TET                                             |
| 68/17        | Veal burger                | Typhimurium 4,5,12:i:-        | ND        | AMP,STR,SMX,TET                                             |
| 69/17        | Beef minced meat           | Typhimurium 4,5,12:i:-        | ND        | AMP,STR,SMX,TET                                             |
| 124/17       | Mollusk                    | Typhimurium 4,5,12:i:1,2      | ND        | ND                                                          |
| 241/17       | Spanish omelette           | Enteritidis 9,12:g,m:-        | ND        | ND                                                          |
| 242/17       | Spanish omelette           | Enteritidis 9,12:g,m:-        | ND        | ND                                                          |
| 243/17       | Spanish omelette           | Enteritidis 9,12:g,m:-        | ND        | ND                                                          |
| 244/17       | Spanish omelette           | Enteritidis 9,12:g,m:-        | ND        | ND                                                          |
| 245/17       | Spanish omelette           | Enteritidis 9,12:g,m:-        | ND        | ND                                                          |
| 1/18         | UNK                        | Indiana 1,4,12:z:1,7          | ND        | ND                                                          |
| 2/18         | Carcass surface            | Typhimurium 4,5,12:i:1,2      | ND        | AMP,CTX(I),KAN (I),STR,SMX,TET                              |
| 3/18         | Carcass surface            | Typhimurium 4,5,12:i:1,2      | ND        | AMP,AMX(I),KAN(I),STR,SMX,TET,AZM                           |
| 16/18        | Minced meat                | Typhimurium 4,12:i:1,2        | ND        | AMP,KAN,STR,SMX,TET                                         |
| 17/18        | Minced meat                | Typhimurium 4,5,12:i:1,2      | ND        | AMP,STR,SMX,TET,NIT(I)                                      |
| 42/18        | Bovine carcass surface     | Enteritidis 9,12:g,m:         | ND        | ND                                                          |
| <b>38/19</b> | <b>Fresh pork sausage</b>  | <b>Typhimurium 4,5,12:i:-</b> | <b>ND</b> | <b>AMP,AMX,CTX,CHL,GEN,KAN,FOX,STR,SMX,TET,TMP,TOB, COL</b> |
| 4/19         | Porcine carcass surface    | Derby 4,12:f,g:-              | ND        | S                                                           |
| 5/19         | Porcine carcass surface    | Derby 4,12:f,g:-              | ND        | S                                                           |
| 6/19         | Chicken meat               | Agona 4,12:f,g,s:-            | ND        | S                                                           |
| 217/19       | Oysters                    | Enteritidis 9,12:g,m:-        | ND        | S                                                           |

<sup>a</sup>Isolates are designated with the initials of the center which supplied them: “Laboratorio de Salud Pública” (LSP) of the Principality of Asturias, Spain, followed by a serial number/last two numbers of the year of recovery.

<sup>b</sup>Source relates to subsamples of analyzed samples. UNK, unknown source.

<sup>c</sup>PT, Phage Type (determined for isolates of serotypes Enteritidis, Typhimurium and the monophasic 4,[5],12:i:- variant until the middle of 2017; UT, UnTypeable; RDNC, Reacted but Did Not Conform.

<sup>d</sup>COL, colistin; AMP, ampicillin; AMX, amoxicillin- clavulanic acid, CTX, cefotaxime; FOX, cefoxitin; CHL, chloramphenicol; STR, streptomycin; GEN, gentamicin; TOB, tobramycin; KAN, kanamycin; SMX, sulfonamides; TET, tetracycline; TMP, trimethoprim; NIT, nitrofurantoin; AZM, azithromycin; NAL, nalidixic acid; CIP, ciprofloxacin; S, susceptible; I, intermediate.



**Table S2.** Accession numbers of the genomes of food-borne isolates of *Salmonella enterica* serovar 4,[5],12:i:- resistant to colistin, parameters related to the quality of the assemblies, as provided by VelvetOptimizer implemented in PLACNET (<https://omictools.com/placnet-tool>)

| Isolate <sup>a</sup> | kmer | Contigs | N50     | Longest contig<br>(bp) | Total bp<br>in contigs | Contigs<br>> 1 kb | Library     | Coverage | GenBank<br>accession number |
|----------------------|------|---------|---------|------------------------|------------------------|-------------------|-------------|----------|-----------------------------|
| LSP 237/15           | 117  | 100     | 341,839 | 844,879                | 5,087,789              | 44                | 546 +/- 151 | 20x      | JACXKV000000000             |
| LSP 295/15           | 117  | 79      | 445,450 | 1,505,741              | 4,937,004              | 23                | 554 +/- 143 | 30x      | JACXKU000000000             |
| LSP 298/15           | 117  | 86      | 440,656 | 1,354,276              | 5,026,262              | 30                | 582 +/- 155 | 25x      | JACXKT000000000             |
| LSP 38/19            | 131  | 218     | 316,491 | 737,096                | 5,416,570              | 88                | 385 +/- 121 | 45x      | JAGMWH000000000             |

<sup>a</sup>, Isolates are designated with the initials of the center which supplied them: “Laboratorio de Salud Pública” (LSP) of the Principality of Asturias, Spain, followed by a serial number/last two numbers of the year of recovery.
